# Supplementary material
Source: Springer Nature journal article supplement (https://www.springermedizin.de/resource/supplementary/12992_2013_251_MOESM3_ESM.pdf/9616204)

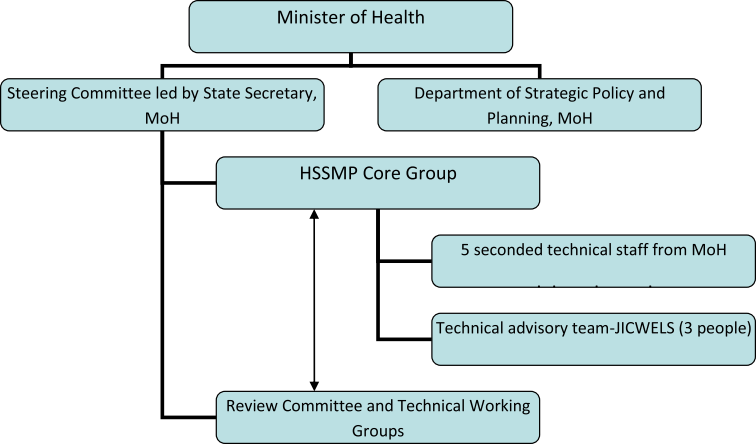

Supplement: MOESM3 [file 9616204]
